# Supplementary material
Source: PubMed Central journal article supplement (PMC5776731)
Supplement: NIHMS925992-supplement-1.pdf [file NIHMS925992-supplement-1.pdf]

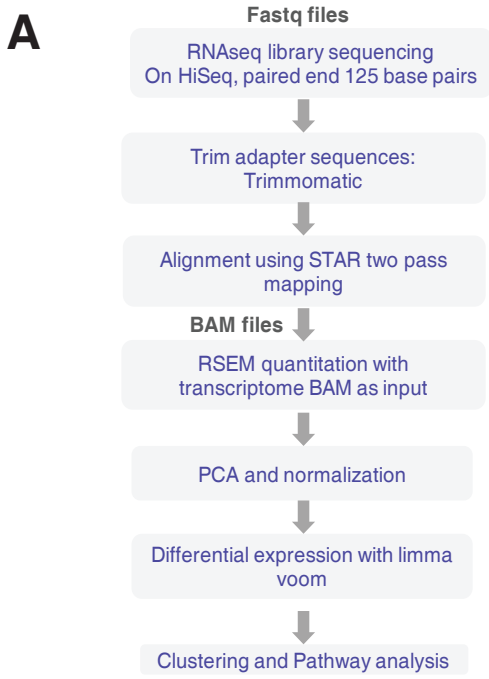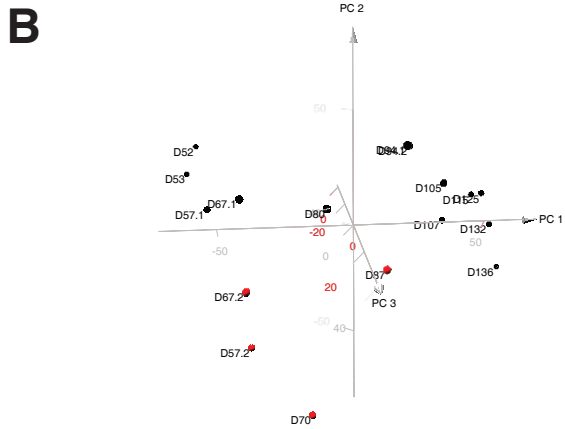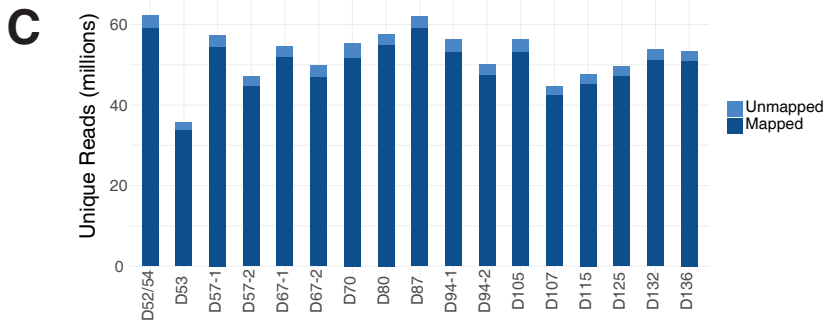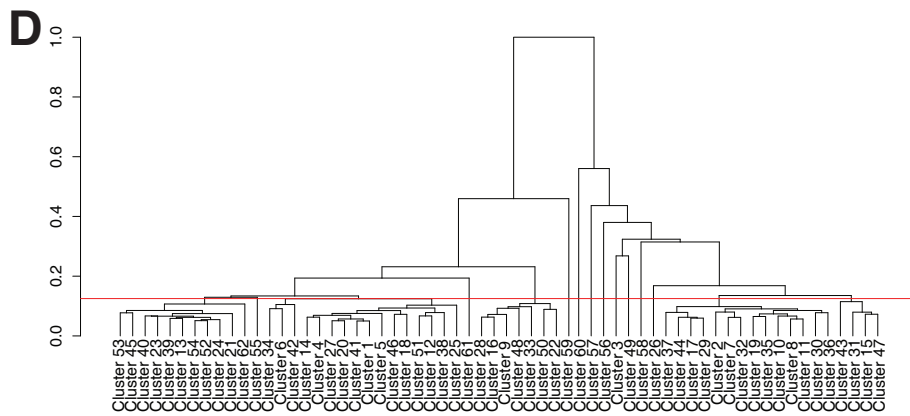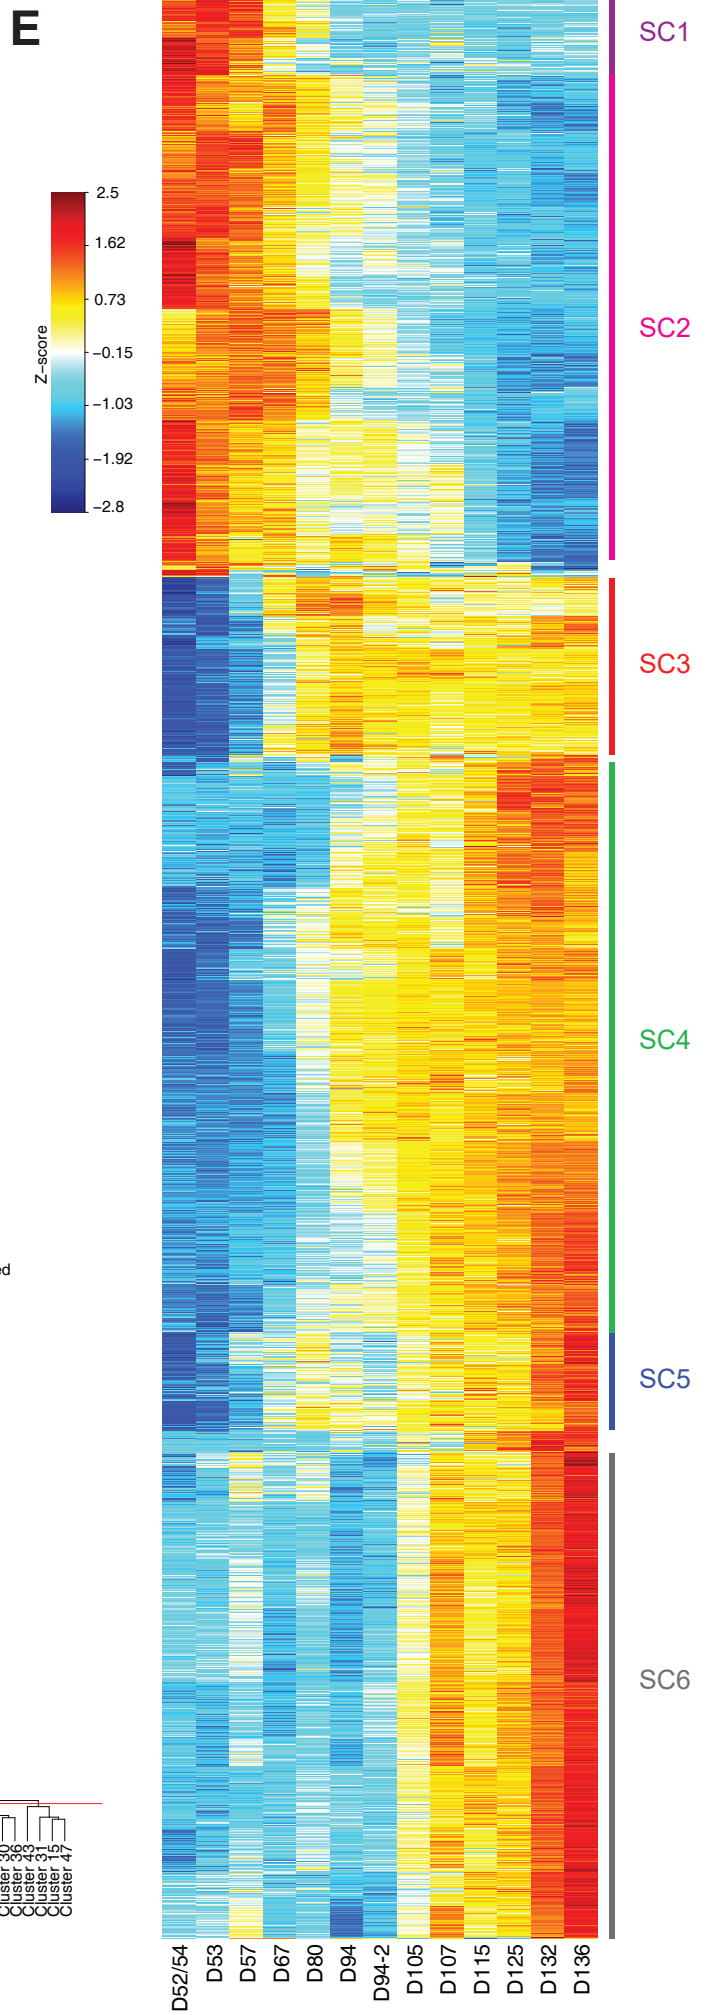

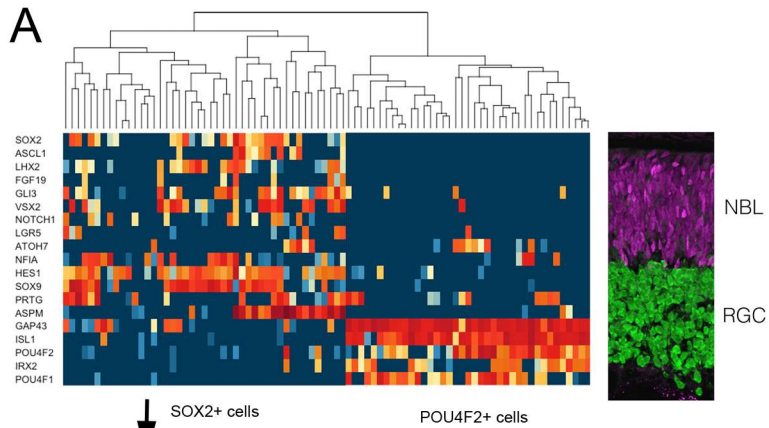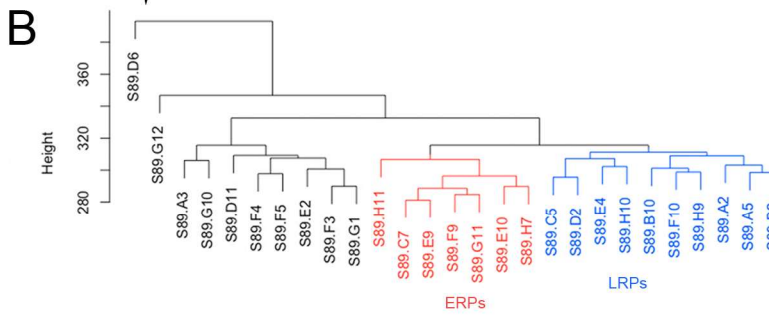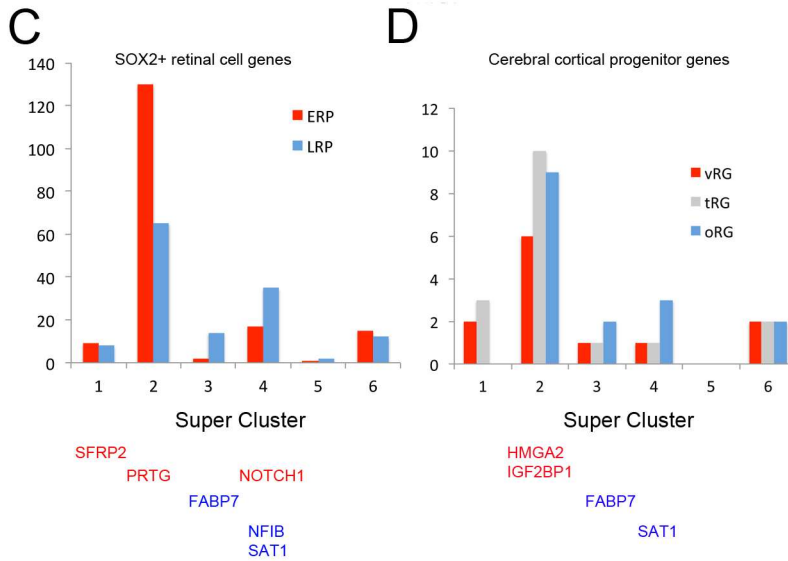

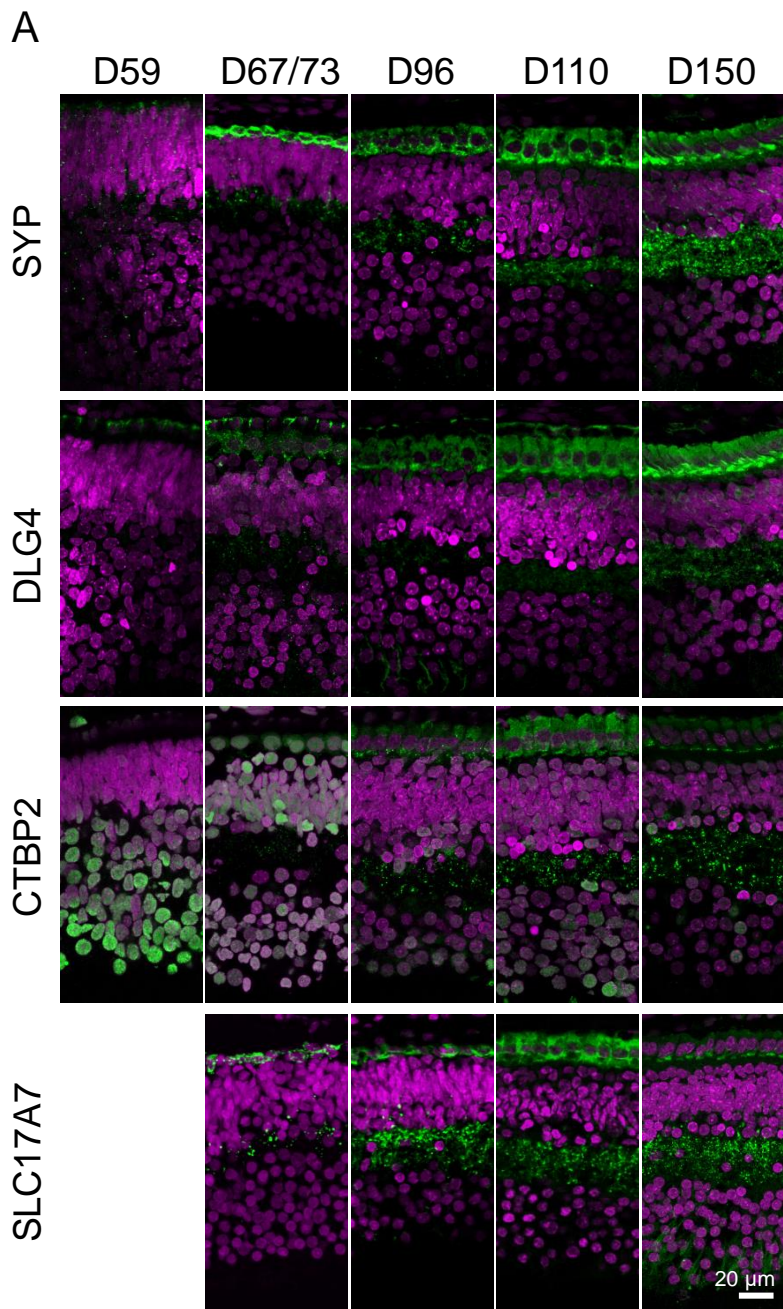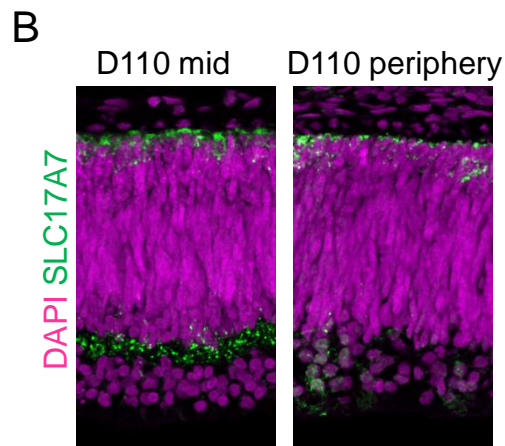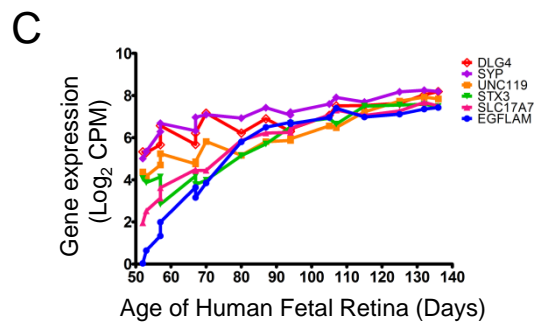



**A**

## STAR 2-pass Alignment

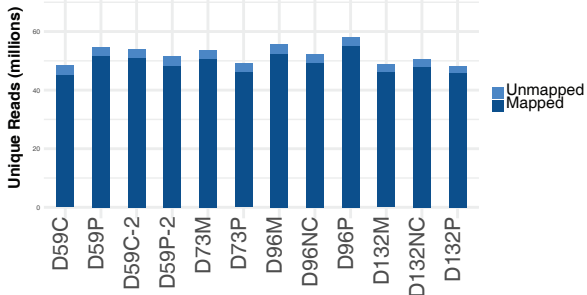**B**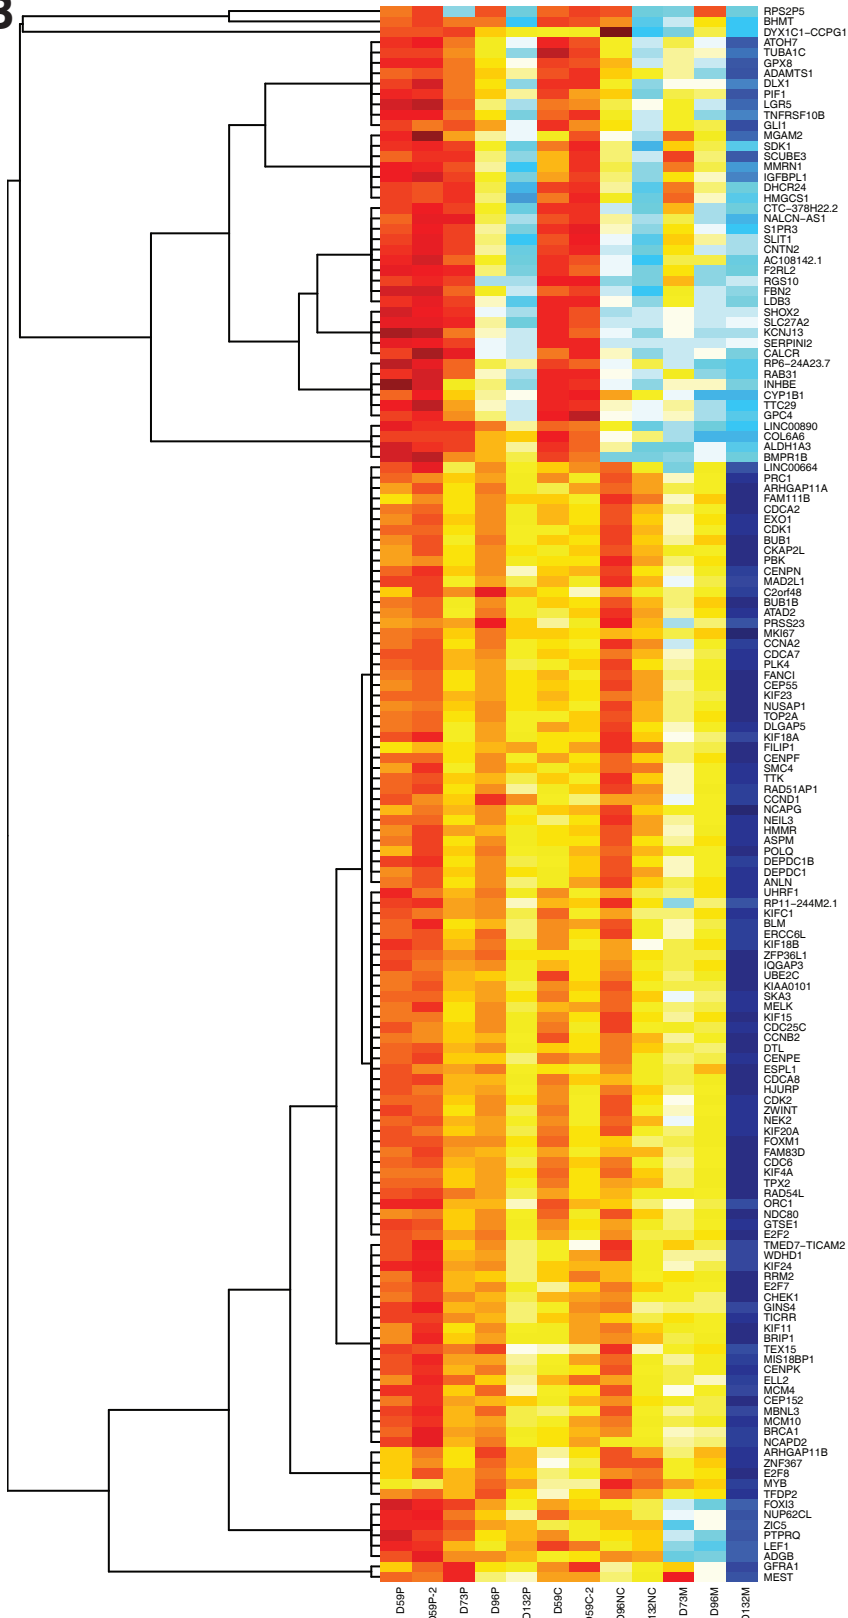**C**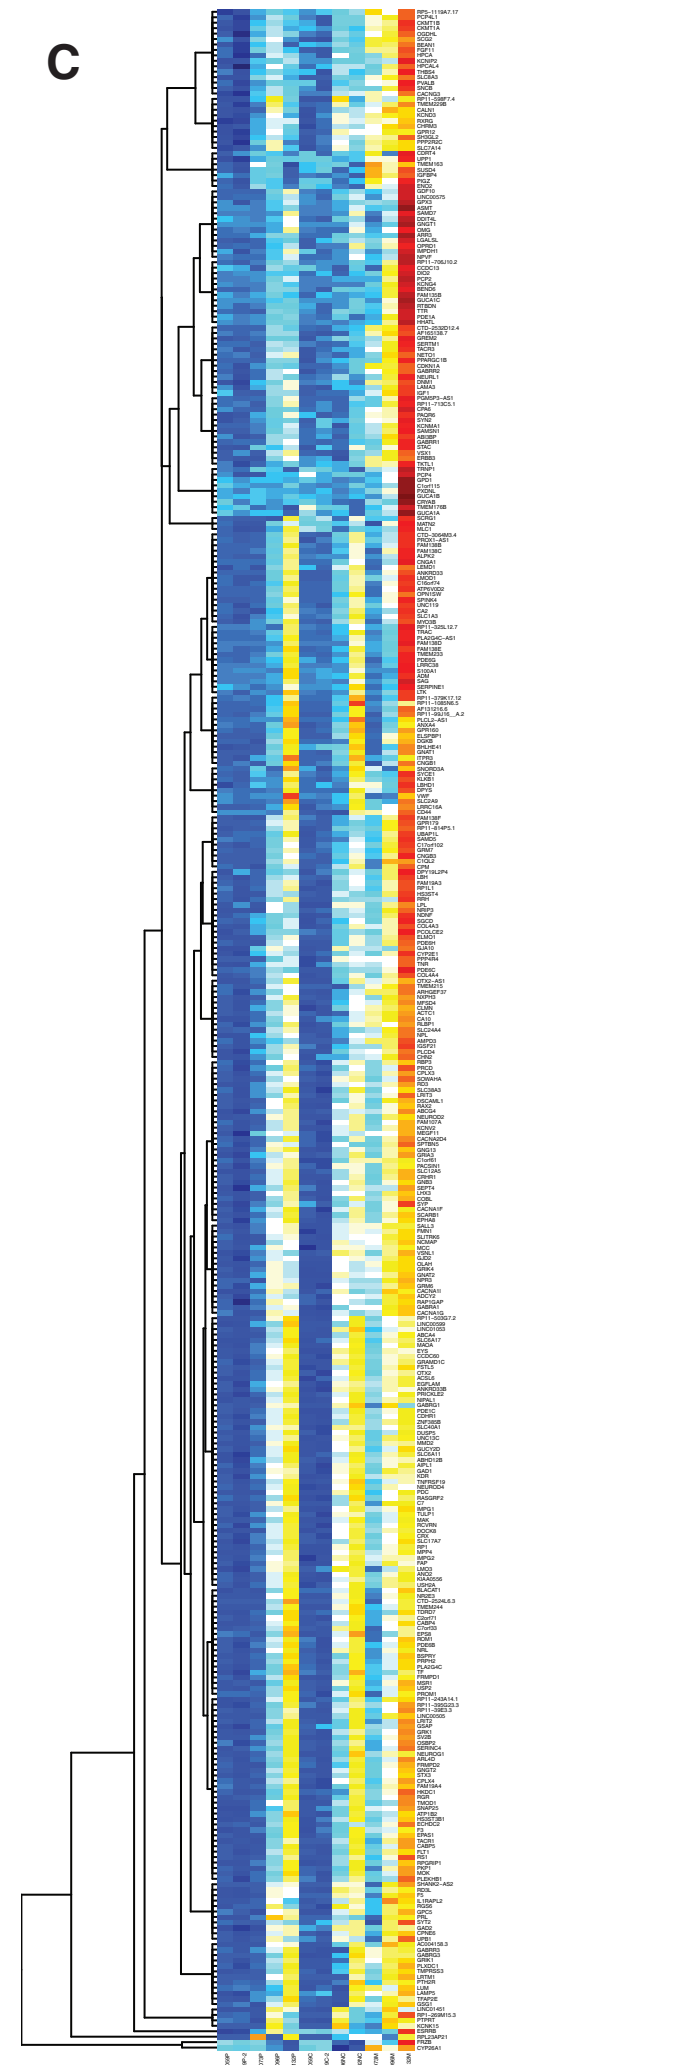

**A****Eye field Transcription Factors**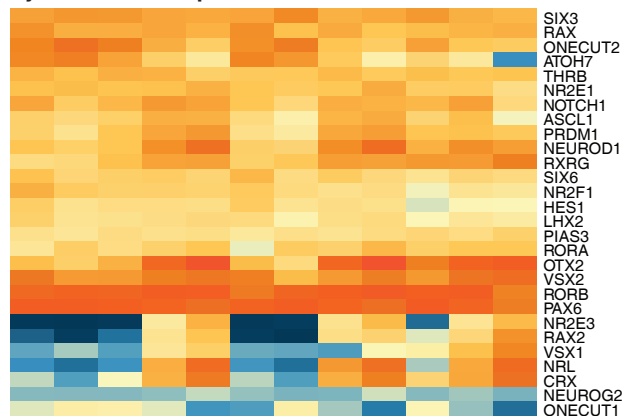**Phototransduction**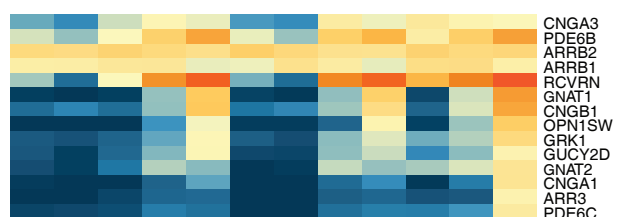**Amacrine**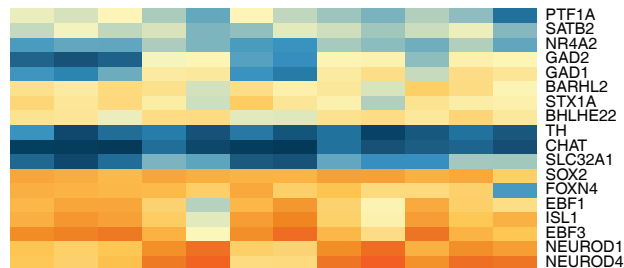**Horizontal**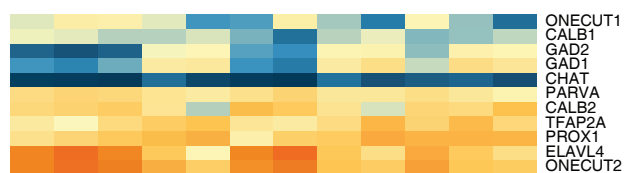

D59P D59P-2 D73P D96P D132P D59C D59C-2 D96NC D132NC D73M D96M D132M

Periphery Central Macula

**B****Cones**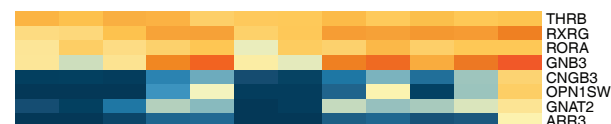**Rods**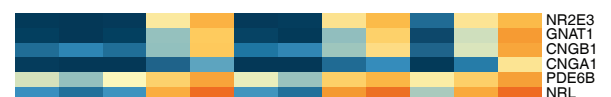**Ganglion**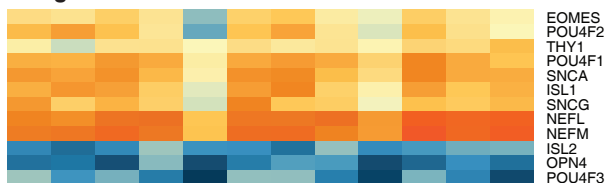**Muller glia**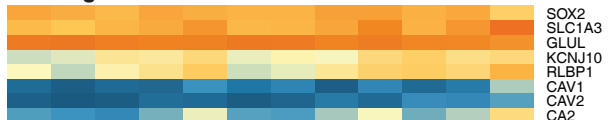**Synapse**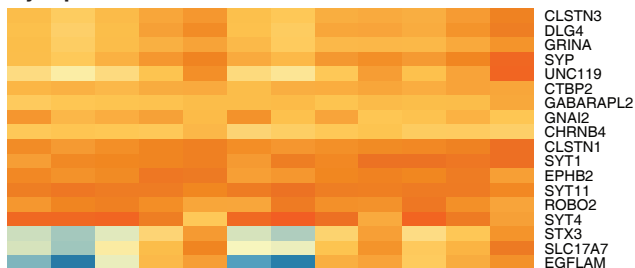**FGF signaling**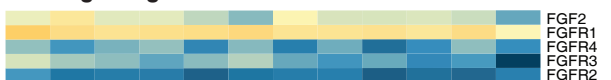

D59P D59P-2 D73P D96P D132P D59C D59C-2 D96NC D132NC D73M D96M D132M

Periphery Central Macula

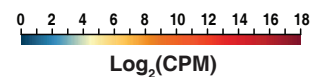



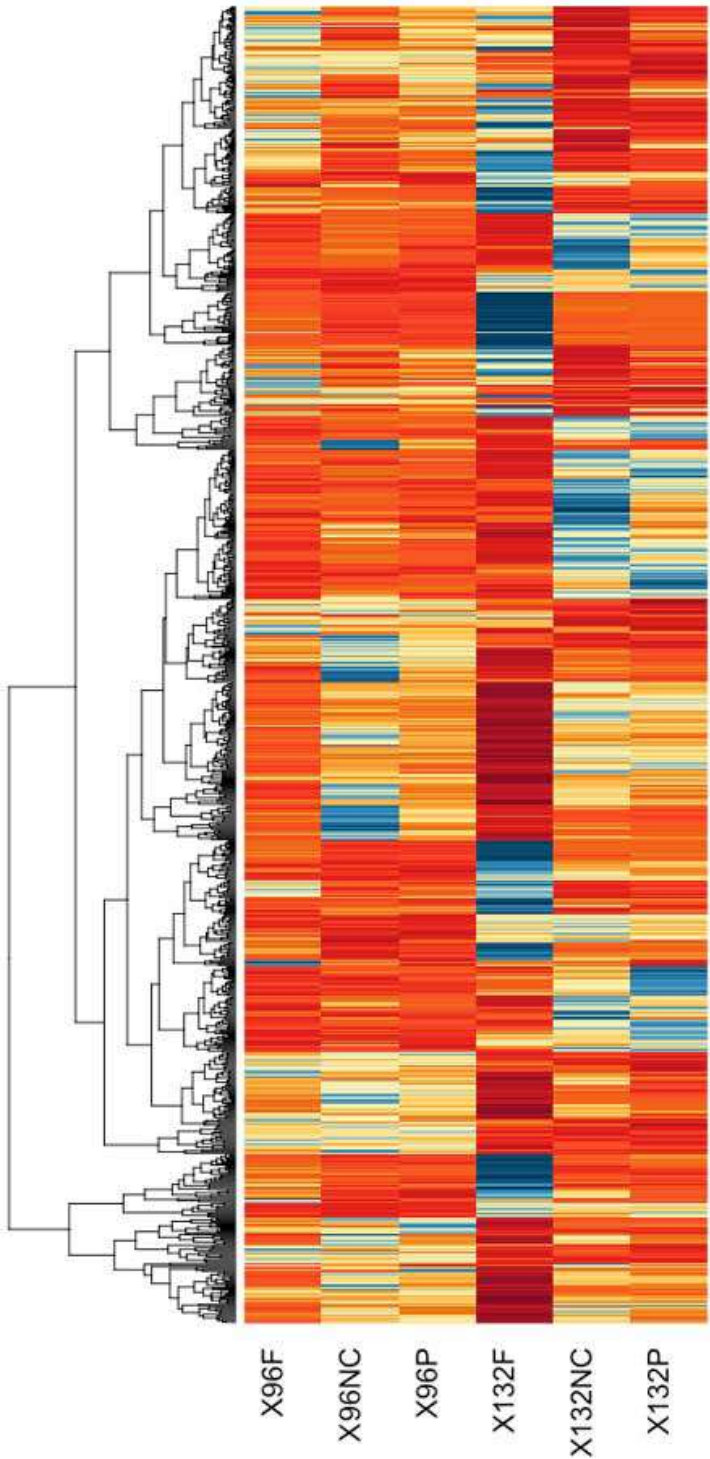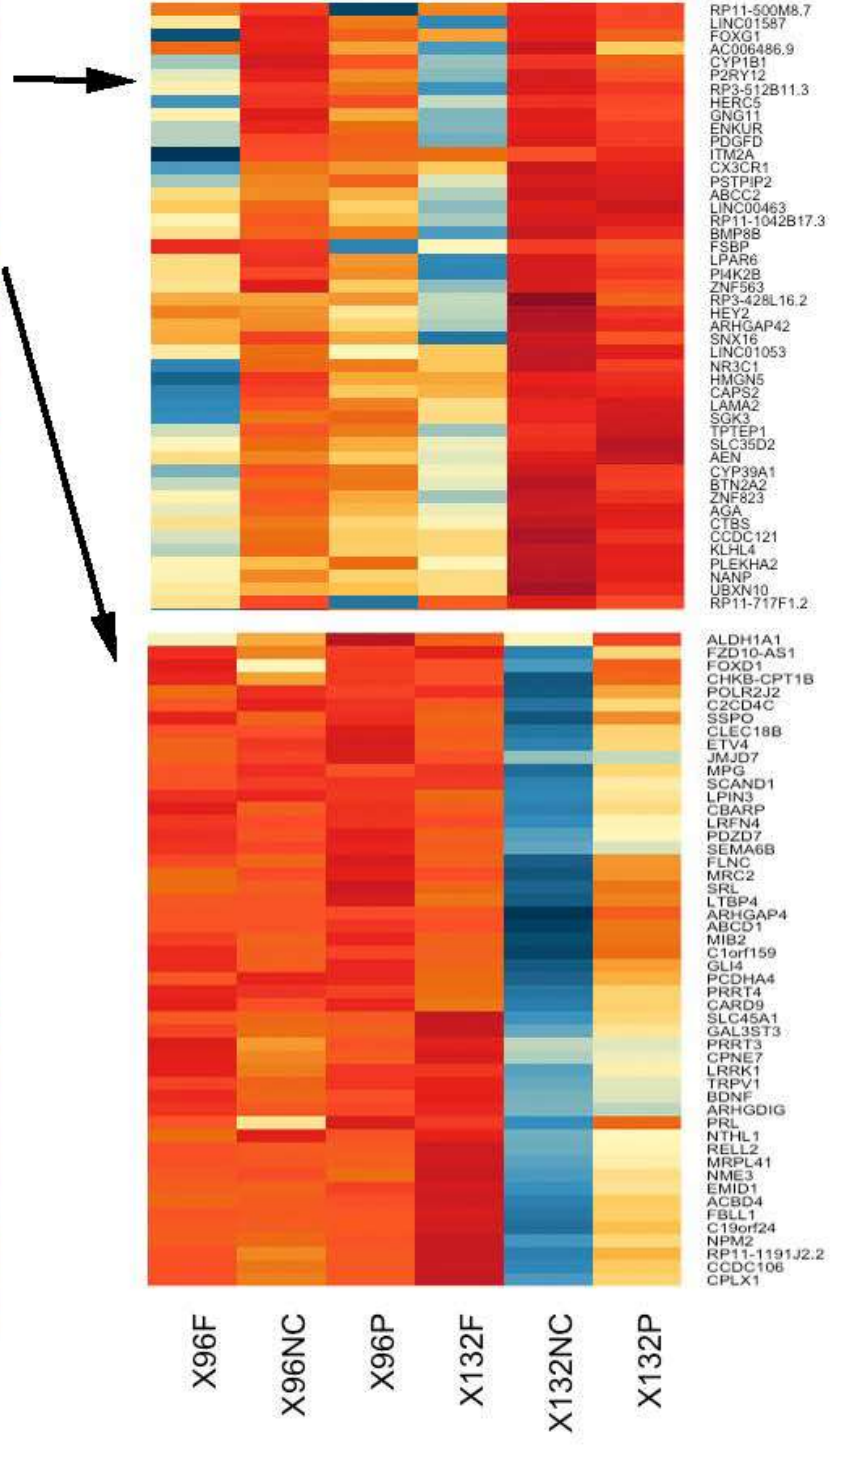

*ATOH7*  
D89

Temporal

Fovea

Optic  
nerve

Nasal

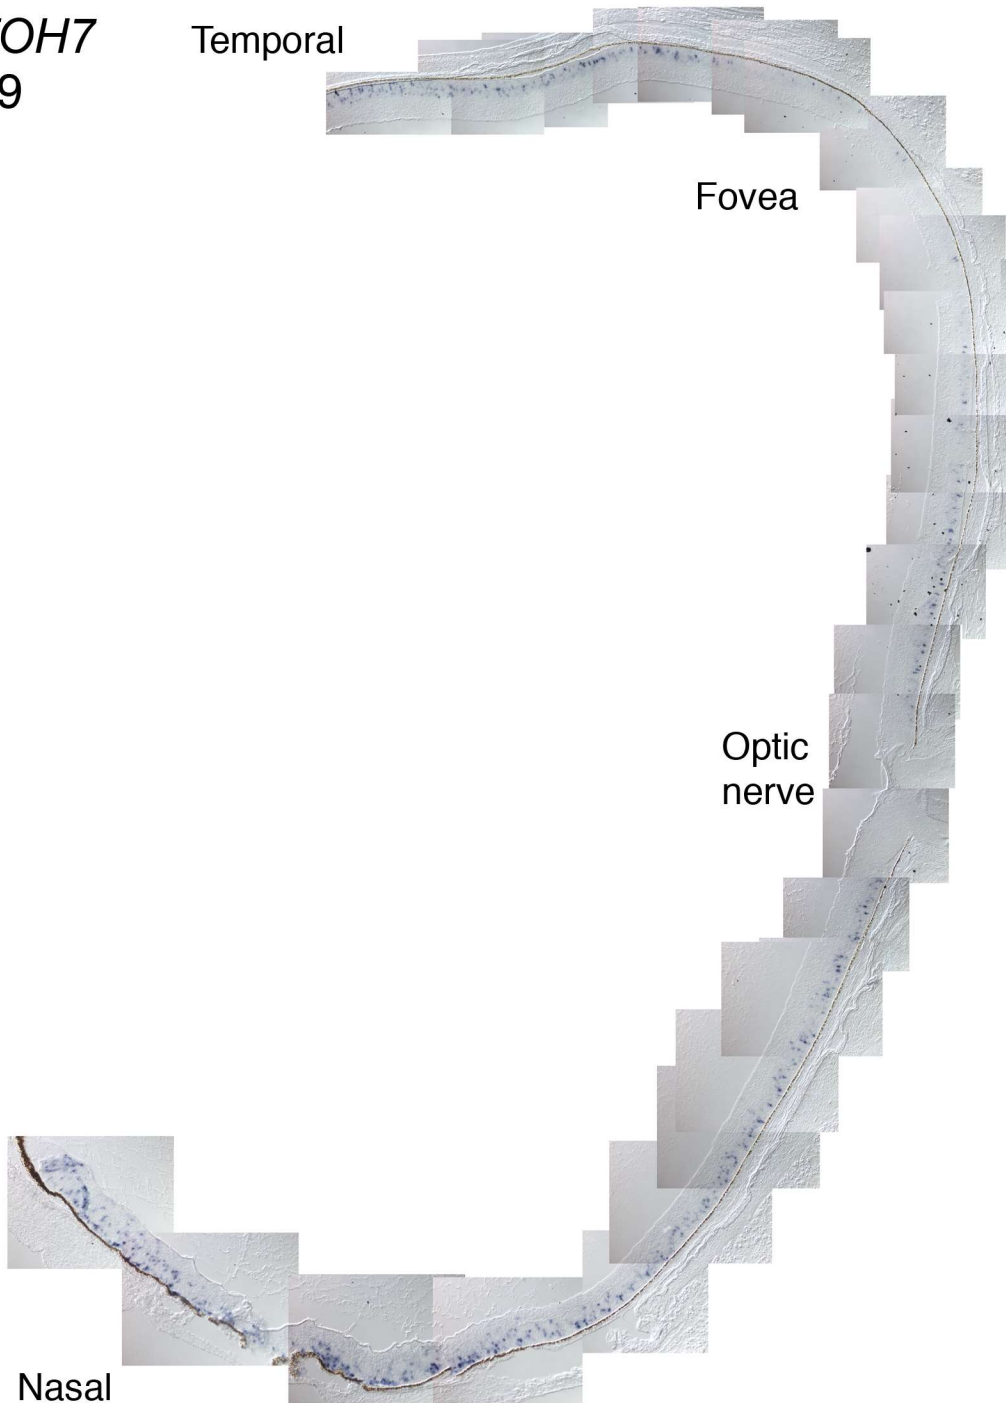



Table S1

| Sample_ID                                                                                      | Sample_day | RIN |
|------------------------------------------------------------------------------------------------|------------|-----|
| rsem_star_trimmed_R42015-059pf_52-54d-F5-IR_Aligned.toTranscriptome.genes.results              | D52        | 10  |
| rsem_star_trimmed_R42015-066pf_53d-F12-IR_Aligned.toTranscriptome.genes.results                | D53        | 10  |
| rsem_star_trimmed_R42015-057pf_57d-F3-IR_Aligned.toTranscriptome.genes.results                 | D57        | 7.7 |
| rsem_star_trimmed_R42015-070pf_57d-F16-IR_Aligned.toTranscriptome.genes.results                | D57-2      | 9.2 |
| rsem_star_trimmed_R42015-060pf_67d-F6_Aligned.toTranscriptome.genes.results                    | D67        | 7.9 |
| rsem_star_trimmed_R42015-065pf_67d-F11-IR_Aligned.toTranscriptome.genes.results                | D67-2      | 8.9 |
| rsem_star_trimmed_R42015-064pf_70d-F10-IR_Aligned.toTranscriptome.genes.results                | D70        | 8.8 |
| rsem_star_trimmed_R42015-058pf_80d-F4-IR_Aligned.toTranscriptome.genes.results                 | D80        | 7.8 |
| rsem_star_trimmed_R42015-061pf_87d-F7_Aligned.toTranscriptome.genes.results                    | D87        | 9.7 |
| rsem_star_trimmed_R42015-067pf_94d-F13-IR_Aligned.toTranscriptome.genes.results                | D94        | 9   |
| rsem_star_trimmed_R42015-068pf_94d-F14-IR_Aligned.toTranscriptome.genes.results                | D94-2      | 8.7 |
| rsem_star_trimmed_R42015-071pf_105d-F17-IR_Aligned.toTranscriptome.genes.results               | D105       | 9.3 |
| rsem_star_trimmed_R42015-062pf_107d-F8-IR_Aligned.toTranscriptome.genes.results                | D107       | 9.3 |
| rsem_star_trimmed_R42015-069pf_115d-F15-IR_Aligned.toTranscriptome.genes.results               | D115       | 8.7 |
| rsem_star_trimmed_R42015-063pf_125d-F9-IR_Aligned.toTranscriptome.genes.results                | D125       | 8.1 |
| rsem_star_trimmed_R42015-055pf_132d-F1-IR_Aligned.toTranscriptome.genes.results                | D132       | 8.3 |
| rsem_star_trimmed_R42015-056pf_136d-F2-IR_Aligned.toTranscriptome.genes.results                | D136       | 8.2 |
| rsem_star_trimmed_R42017-023pf_59dH-27008Central_merge_Aligned.toTranscriptome.genes.results   | D59C       | 7.2 |
| rsem_star_trimmed_R42017-024pf_59dH-27008Periphery_merge_Aligned.toTranscriptome.genes.results | D59P       | 9   |
| rsem_star_trimmed_R42017-025pf_59dH-27031Central_merge_Aligned.toTranscriptome.genes.results   | D59C-2     | 9.3 |
| rsem_star_trimmed_R42017-026pf_59dH-27031Periphery_merge_Aligned.toTranscriptome.genes.results | D59P-2     | 9.8 |
| rsem_star_trimmed_R42017-027pf_73dFovea_merge_Aligned.toTranscriptome.genes.results            | D73M       | 8.7 |
| rsem_star_trimmed_R42017-028pf_73dPeriphery_merge_Aligned.toTranscriptome.genes.results        | D73P       | 7.8 |
| rsem_star_trimmed_R42017-029pf_96dFovea_merge_Aligned.toTranscriptome.genes.results            | D96M       | 8.8 |
| rsem_star_trimmed_R42017-030pf_96dNasalCentral_merge_Aligned.toTranscriptome.genes.results     | D96NC      | 7.5 |
| rsem_star_trimmed_R42017-031pf_96dPeriphery_merge_Aligned.toTranscriptome.genes.results        | D96P       | 8.7 |
| rsem_star_trimmed_R42017-032pf_132dFovea_merge_Aligned.toTranscriptome.genes.results           | D132M      | 6.8 |
| rsem_star_trimmed_R42017-033pf_132dNasalCentral_merge_Aligned.toTranscriptome.genes.results    | D132NC     | 8.7 |
| rsem_star_trimmed_R42017-034pf_132dPeriphery_merge_Aligned.toTranscriptome.genes.results       | D132P      | 6.8 |

Table S4

NRL  
NR2E3  
VSX1  
THRB  
NEUROG2  
PIAS3  
RORA  
CRX  
HES1  
NR2F1  
NOTCH1  
PRDM1  
LHX2  
SIX6  
RAX  
ONECUT1  
ONECUT2  
OTX2  
RXRG  
NEUROD1  
ASCL1  
ATOH7  
SIX3  
PAX6  
RORB  
VSX2  
NR2E1  
GAD2  
GAD1  
TFAP2A  
PROX1  
PARVA  
ELVAL3  
CALB2  
CALB1  
ELAVL4  
SYP  
DLG4  
GABARAPL2  
UNC119  
GRINA  
CLSTN3  
CLSTN1  
SYT1  
GNAI2  
SYT11  
EGFLAM  
ROBO2

Table S4

STX3  
SLC17A7  
EPHB2  
CTBP2  
SYT4  
CHRNA4  
AQP4  
CAV1  
CAV2  
KCNJ10  
SOX9-AS  
CA2  
RLBP1  
SLC1A3  
SOX2  
GLUL  
CABP5  
GRM6  
PRDM8  
LHX4  
BHLHE22  
PRKCA  
RCVRN  
AIPL1  
ROM1  
GUCA1  
GNGT2  
PDE6H  
OPN1SW  
GNAT2  
PDE6B  
GNAT1  
CNGB1  
CNGA1  
RHO  
NEFM  
POU4F2  
EBF1  
ISL1  
SYT13  
NRP1  
IRX2  
POU4F1  
GFI1  
POU4F3  
WT1  
SNCG  
GAP43

Table S4

INA  
PTF1A  
LHX1  
TH  
SLC18A3  
CHAT  
SLC32A1  
FOXN4  
SLC6A9  
STX1A  
PDE6A  
GUCA1A  
GUCA1B

Table S5

NRL  
NR2E3  
VSX1  
THRB  
NEUROG2  
PIAS3  
RORA  
CRX  
HES1  
NR2F1  
NOTCH1  
PRDM1  
LHX2  
SIX6  
RAX  
ONECUT1  
ONECUT2  
OTX2  
RXRG  
NEUROD1  
ASCL1  
ATOH7  
SIX3  
PAX6  
RORB  
VSX2  
NR2E1  
GAD2  
GAD1  
TFAP2A  
PROX1  
PARVA  
CALB2  
CALB1  
ELAVL4  
SYP  
DLG4  
GABARAPL2  
UNC119  
GRINA  
CLSTN3  
CLSTN1  
SYT1  
GNAI2  
SYT11  
EGFLAM  
ROBO2  
STX3

Table S5

SLC17A7  
EPHB2  
CTBP2  
SYT4  
CHRNA4  
CAV1  
CAV2  
KCNJ10  
CA2  
RLBP1  
SLC1A3  
SOX2  
GLUL  
CABP5  
GRM6  
PRDM8  
LHX4  
BHLHE22  
PRKCA  
RCVRN  
AIPL1  
ROM1  
GNGT2  
PDE6H  
OPN1SW  
GNAT2  
PDE6B  
GNAT1  
CNGB1  
CNGA1  
RHO  
NEFM  
POU4F2  
EBF1  
ISL1  
SYT13  
NRP1  
IRX2  
POU4F1  
POU4F3  
SNCG  
GAP43  
INA  
PTF1A  
LHX1  
TH  
CHAT  
SLC32A1



Table S5

FOXN4  
SLC6A9  
STX1A  
PDE6A  
GUCA1A  
GUCA1B  
RAX2  
NEUROD4  
HES5  
HEY2  
DLX1  
DLX2  
EOMES  
BARHL2  
EBF2  
EBF3  
EBF4  
SALL3  
NR4A2  
SATB2  
NR2F2  
RB1  
IRX5  
SOX8  
SOX9  
GNB1  
GNB3  
GNGT1  
PDE6C  
PDE6G  
CNGA3  
CNGB3  
GUCA1C  
GUCY2D  
RGS9  
GNB5  
ARR3  
GRK1  
SLC24A1

## Supplementary Figure Legends

**Figure S1**, related to Figure 1. **A.** Workflow for whole retina RNA-seq analysis. **B.** Principal components analysis (PCA) plot showing the four outliers removed from the study. **C.** The number of mapped reads per sample. **D–E.** AP clustering of genes that were differentially expressed between the two youngest (D52/53 and D53) and two oldest (D132, D136) samples. The clustering yielded 62 clusters (**C**). The tree was cut at the indicated red line in (**C**), which yielded 6 superclusters (SCs).

**Figure S2**, related to Figure 2. **A.** Single cell RNA-seq data from Pollen et al.,: 84 cells from D63 retina were clustered using *SOX2* (progenitor) and *POU4F2* (ganglion cell). Two predominant clusters were apparent corresponding to these two cell types. Right panel: a D59 peripheral retina immunostained with *SOX2* (magenta) and *POU4F2* (green). **B.** Hierarchical clustering of just the three main clusters generated from *SOX2*<sup>+</sup> cells. Cells in red and blue contained other cell cycle genes characteristic of progenitor cells. Furthermore, the red cluster was identified as “early retinal progenitors (ERPs)” expressing *PRTG*, while the blue cluster was *PRTG*<sup>-</sup> and labeled “late retinal progenitors (LRPs)”. **C.** The top 1000 differentially expressed genes in ERPs and LRPs were compared against the genes present in our superclusters (SCs) 1–6; ERP genes associated more with SCs 1 and 2, whereas more LRPs were represented in SCs 3 and 4. **D.** Genes in the three cortical progenitor populations—ventricular radial glia (vRG), intermediate progenitors (tRG), and outer radial glia (oRG)—were compared to retinal genes in SCs 1–6. Our analysis revealed that vRG genes were more likely to be in SCs 1 and 2. In contrast, more oRG genes were detected in SCs 2–4.

**Figure S3**, related to Figure 5. **Synapse formation in the fovea. A.** Three pre-synaptic markers, SYP, CTBP2 (ribbon), and SLC17A7 (glutamatergic) expression were observed first in the inner plexiform layer (IPL) as early as D67 and in both IPL and outer plexiform layer (OPL) from D96. The post-synaptic marker, DLG4, was observed from D67/73. All of the synaptic markers were visualized in green. **C.** Synapse-related genes were identified using GO term analysis, and the Counts Per Million (CPM) values of a subset of the genes were Log<sub>2</sub> transformed and plotted as a heatmap. GCL: Ganglion Cell Layer; INL: Inner Nuclear Layer; NBL: Neuroblastic layer; ONL: Outer Nuclear Layer.

**Figure S4**, related to Figure 1. **Comparison of fetal RNA-seq datasets from present and previously published Aldiri, *et al.* study. A.** Principal component analysis (PCA) of the gene level expression data from Aldiri, *et al.* Principal component (PC) 1 vs. PC2 in the upper panel and PC2 vs. PC3 in the lower panel demonstrate discordance of FW18 and FW10 from the remaining samples, indicating that these samples are outliers in the data. **B.** PCA of the gene level expression data of the Aldiri *et al.*, (cool hues with sample names starting with “F”) and the data from this report (hot hues with sample names starting with “D”). PC1 vs. PC2 in the upper panel indicates the largest variance to be associated with experimental factors attributed to the two investigations, and the second largest variance to be linked to the age of the samples. PC2 vs. PC3 in the lower panel further show FW18 to be an outlier from other samples. **C.** Heatmap comparing expression values from the two reports of genes from 3 epochs described in

Figure 1C. **D.** Heatmap comparing expression values from the two reports of photoreceptor genes highlighted in Figure 4C.

**Figure S5**, related to Figure 6A, B. **RNA-seq of macula, nasal central, and peripheral retina.** **A.** Alignment results after RNA-seq data processing. **B and C.** Genes that were differentially downregulated (**B**) or upregulated (**C**) (as identified by DESeq) between D59 central and D132 macula samples.

**Figure S6**, related to Figure 6C. **Heatmaps of genes known to be related to retinal cell types, synapses, and FGF signaling.**

**Figure S7**, related to Figure 6. **Hierarchical clustering of genes using K-median and cosine correlation.** Genes that are upregulated or downregulated early in the macula vs. nasal central and periphery are highlighted.

**Figure S8**, related to Figure 6E. ***In situ* hybridization for ATOH7 in a nasal-temporal section of D89 retina.** *ATOH7* is no longer expressed in the fovea at this stage, but *ATOH7*-expressing cells are present in peripheral and posterior temporal retina (asterisk) and the entire nasal retina. This is consistent with the hypothesis that foveal development is accelerated with respect to the rest of the retina. NBL: neuroblastic layer; GCL: ganglion cell layer; INL: inner nuclear layer, ONL: outer nuclear layer.

**Table S1**, related to Figure 1. List of samples and their RNA Integrity Number (RIN).

**Table S2**, related to Figure 1. List of 3072 differentially expressed genes between the youngest two (D52/54 and D53) and oldest two (D132/D136) retina. Also incorporated are the supercluster information and the correlation with mouse.

**Table S3**, related to Figure 6. List of genes that are differentially expressed between D59 central retina and D132 macula.

**Table S4**, related to Figure 7. List of 109 genes whose expression was used to compare the development stages between mouse and human retina. These genes are expressed in various cell types of the retina and share homology between mouse and human.

**Table S5**, related to Figure 8. List of 135 genes whose promoters were used for scanning transcription factor binding sites. The binding site data from this list of genes was used to construct the potential gene network.
